# Supplementary material for: Identification of novel microbes associated with pelvic inflammatory disease and infertility
Source: PubMed Central journal article supplement — Sex Transm Infect. 2016 Jan 29;92(6):441–6. doi: 10.1136/sextrans-2015-052285 (PMC5013099; doi:10.1136/sextrans-2015-052285), 2016-01-29
Supplement: sextrans-2015-052285-s2.pdf [file sextrans-2015-052285-s2.pdf]

Supplementary Table 1: Associations between selected fastidious bacterial vaginosis associated bacteria<sup>a</sup>, ureaplasma bacteria, and histologically confirmed endometritis<sup>b</sup> in a subset of women without gonorrhea and chlamydia at baseline

|                                                         | Endometritis +<br>n=115<br>n/N (%) | Endometritis -<br>n=232<br>n/N (%) | Adjusted OR <sup>γ</sup><br>(95% CI) |
|---------------------------------------------------------|------------------------------------|------------------------------------|--------------------------------------|
| <b>BV-associated bacteria<sup>a</sup> (1 or more +)</b> |                                    |                                    |                                      |
| Cervix and/or endometrium                               | 94/115 (81.7)                      | 198/232 (85.3)                     | 0.7 (0.4 – 1.3)                      |
| Endometrium                                             | 67/113 (59.3)                      | 128/229 (55.9)                     | 1.1 (0.7 – 1.7)                      |
| <b>BV-associated bacteria<sup>a</sup> (all +)</b>       |                                    |                                    |                                      |
| Cervix and/or endometrium                               | 30/51 (58.8)                       | 60/94 (63.8)                       | 0.7 (0.3 – 1.5)                      |
| Endometrium                                             | 7/53 (13.2)                        | 12/113 (10.6)                      | 1.1 (0.4 – 3.1)                      |
| <b><i>Ureaplasma urealyticum</i></b>                    |                                    |                                    |                                      |
| Cervix and/or endometrium                               | 41/110 (37.3)                      | 49/218 (22.5)                      | 2.2 (1.3 – 3.7)                      |
| Endometrium                                             | 13/113 (11.5)                      | 17/229 (7.4)                       | 1.8 (0.8 – 3.8)                      |
| <b><i>Ureaplasma parvum</i></b>                         |                                    |                                    |                                      |
| Cervix and/or endometrium                               | 56/110 (50.9)                      | 130/219 (59.4)                     | 0.7 (0.5 – 1.2)                      |
| Endometrium                                             | 22/113 (19.5)                      | 41/229 (17.9)                      | 1.2 (0.6 – 2.1)                      |

<sup>a</sup> *Leptotrichia sanguinegens*, *Leptotrichia amnionii*, *Atopobium vaginae*, and BVAB1. Comparison group consists of women who tested negative for all four bacteria. In model of “all positive”, women testing positive for some but not all bacteria are excluded.

<sup>b</sup>  $\geq 5$  surface epithelium neutrophils per  $\times 400$  field absent of menstrual endometrium and/or  $\geq 2$  stromal plasma cells per  $\times 120$  field

<sup>γ</sup> Adjusted for age and race

Supplementary Table 2: Associations between selected fastidious bacterial vaginosis-associated bacteria <sup>α</sup>, ureaplasma bacteria, and histologically confirmed endometritis <sup>β</sup> 30 days following treatment for pelvic inflammatory disease in a subset of women without gonorrhea and chlamydia at 30 days

|                                                           | Endometritis <sup>β</sup> +<br>n=117<br>n/N (%) | Endometritis <sup>β</sup> -<br>n=175<br>n/N (%) | Adjusted RR <sup>γ</sup><br>(95% CI) |
|-----------------------------------------------------------|-------------------------------------------------|-------------------------------------------------|--------------------------------------|
| <b>BV-associated bacteria (1 or more +) <sup>α</sup></b>  |                                                 |                                                 |                                      |
| Cervix and/or endometrium                                 | 102/117 (87.2)                                  | 149/175 (85.1)                                  | 1.1 (0.5 – 2.5)                      |
| Endometrium                                               | 75/114 (65.8)                                   | 114/174 (65.5)                                  | 1.0 (0.6 – 1.8)                      |
| <b>BV-associated bacteria (all positive) <sup>α</sup></b> |                                                 |                                                 |                                      |
| Cervix and/or endometrium                                 | 29/44 (65.9)                                    | 27/53 (50.9)                                    | 2.8 (1.0 – 7.8)                      |
| Endometrium                                               | 10/49 (20.4)                                    | 4/64 (6.3)                                      | 8.5 (1.6 – 44.6)                     |
| <b><i>Ureaplasma urealyticum</i></b>                      |                                                 |                                                 |                                      |
| Cervix and/or endometrium                                 | 28/113 (24.8)                                   | 39/172 (22.7)                                   | 1.2 (0.6 – 2.3)                      |
| Endometrium                                               | 7/115 (6.1)                                     | 8/174 (4.6)                                     | 1.4 (0.4 – 4.8)                      |
| <b><i>Ureaplasma parvum</i></b>                           |                                                 |                                                 |                                      |
| Cervix and/or endometrium                                 | 48/115 (41.7)                                   | 49/173 (28.3)                                   | 1.9 (1.1 – 3.5)                      |
| Endometrium                                               | 18/115 (15.7)                                   | 19/174 (10.9)                                   | 2.7 (1.2 – 6.2)                      |

<sup>α</sup> *Leptotrichia sanguinegens*, *Leptotrichia amnionii*, *Atopobium vaginae*, and BVAB1

<sup>β</sup> ≥5 surface epithelium neutrophils per ×400 field absent of menstrual endometrium and/or ≥2 stromal plasma cells per ×120 field

<sup>γ</sup> Adjusted for age, race, and self-reported partner treatment

Supplementary Table 3: Long-term sequelae following PID with selected fastidious bacterial vaginosis-associated<sup>a</sup> and ureaplasma bacteria in a subset of women without gonorrhea and chlamydia at baseline

|                     | Cervical and/or Endometrial BV-associated bacteria:<br>1 or more +<br>N=334<br>n (%)  | Cervical and/or Endometrial BV-associated bacteria:<br>All negative<br>N=55<br>n (%) | Adjusted RR <sup>β</sup><br>(95% CI) | Endometrial BV-associated bacteria:<br>1 or more +<br>N=225<br>n (%) | Endometrial BV-associated bacteria:<br>All negative<br>N=156<br>n (%) | Adjusted RR <sup>β</sup><br>(95% CI) |
|---------------------|---------------------------------------------------------------------------------------|--------------------------------------------------------------------------------------|--------------------------------------|----------------------------------------------------------------------|-----------------------------------------------------------------------|--------------------------------------|
| Recurrent PID       | 72 (22.9)                                                                             | 8 (15.1)                                                                             | 1.4 (0.6 – 3.2)                      | 56 (26.0)                                                            | 23 (15.9)                                                             | 1.6 (0.9 – 2.9)                      |
| Infertility         | 70 (21.3)                                                                             | 5 (9.1)                                                                              | 2.6 (1.0 – 6.8)                      | 51 (23.1)                                                            | 25 (16.2)                                                             | 1.5 (0.9 – 2.6)                      |
| Chronic Pelvic Pain | 153 (47.4)                                                                            | 26 (49.1)                                                                            | 1.0 (0.6 – 1.8)                      | 96 (44.0)                                                            | 78 (51.7)                                                             | 0.8 (0.5 – 1.2)                      |
|                     | Cervical and/or Endometrial BV-associated bacteria:<br>All positive<br>N=107<br>n (%) | Cervical and/or Endometrial BV-associated bacteria:<br>All negative<br>N=55<br>n (%) | Adjusted RR <sup>α</sup><br>(95% CI) | Endometrial BV-associated bacteria:<br>All positive<br>N=25<br>n (%) | Endometrial BV-associated bacteria:<br>All negative<br>N=156<br>n (%) | Adjusted RR <sup>β</sup><br>(95% CI) |
| Recurrent PID       | 29 (29.0)                                                                             | 8 (15.1)                                                                             | 1.9 (0.8 – 4.9)                      | 11 (47.8)                                                            | 23 (15.9)                                                             | 4.7 (1.7 – 12.8)                     |
| Infertility         | 26 (25.0)                                                                             | 5 (9.1)                                                                              | 3.4 (1.1 – 10.4)                     | 3 (12.0)                                                             | 25 (16.2)                                                             | 0.7 (0.2 – 2.8)                      |
| Chronic Pelvic Pain | 42 (40.8)                                                                             | 26 (49.1)                                                                            | 0.8 (0.4 – 1.5)                      | 13 (52.0)                                                            | 78 (51.7)                                                             | 1.1 (0.5 – 2.8)                      |
|                     | Cervical and/or Endometrial UU +<br>N=102<br>n (%)                                    | Cervical and/or Endometrial UU –<br>N=263<br>n (%)                                   | Adjusted RR <sup>α</sup><br>(95% CI) | Endometrial UU +<br>N=36<br>n (%)                                    | Endometrial UU –<br>N=344<br>n (%)                                    | Adjusted RR <sup>β</sup><br>(95% CI) |
| Recurrent PID       | 24 (25.5)                                                                             | 52 (20.7)                                                                            | 1.3 (0.7 – 2.3)                      | 10 (30.3)                                                            | 69 (21.1)                                                             | 1.8 (0.8 – 4.0)                      |
| Infertility         | 19 (19.0)                                                                             | 52 (20.0)                                                                            | 1.0 (0.5 – 1.8)                      | 7 (20.0)                                                             | 69 (20.3)                                                             | 1.0 (0.4 – 2.4)                      |
| Chronic Pelvic Pain | 54 (54.5)                                                                             | 115 (44.9)                                                                           | 1.5 (1.0 – 2.5)                      | 21 (60.0)                                                            | 153 (45.8)                                                            | 1.9 (0.9 – 3.8)                      |
|                     | Cervical and/or Endometrial UP +<br>N=213<br>n (%)                                    | Cervical and/or Endometrial UP –<br>N=157<br>n (%)                                   | Adjusted RR <sup>α</sup><br>(95% CI) | Endometrial UP +<br>N=72<br>n (%)                                    | Endometrial UP –<br>N=308<br>n (%)                                    | Adjusted RR <sup>β</sup><br>(95% CI) |
| Recurrent PID       | 44 (21.5)                                                                             | 32 (22.2)                                                                            | 1.0 (0.6 – 1.7)                      | 18 (25.7)                                                            | 61 (21.0)                                                             | 1.3 (0.7 – 2.5)                      |
| Infertility         | 43 (20.3)                                                                             | 28 (18.3)                                                                            | 1.1 (0.6 – 1.8)                      | 13 (18.1)                                                            | 63 (20.8)                                                             | 0.9 (0.5 – 1.8)                      |
| Chronic Pelvic Pain | 94 (45.4)                                                                             | 78 (51.3)                                                                            | 0.8 (0.5 – 1.2)                      | 36 (50.7)                                                            | 138 (46.3)                                                            | 1.2 (0.7 – 2.1)                      |

<sup>a</sup>*Leptotrichia sanguinegens*, *Leptotrichia amnionii*, *Atopobium vaginae*, and BVAB1. Comparison group consists of women who tested negative for all four bacteria. In model of “all positive”, women testing positive for some but not all bacteria are excluded.

<sup>β</sup> All models are adjusted for age and race. Infertility model additionally adjusted for self-reported infertility at baseline.
